# Supplementary material
Source: publisher site journal article supplement (https://www.spandidos-publications.com/5831/downloadSupplementary)
Supplement: Supplementary file 1 [file downloadSupplementary]

## Sheet: Voluntários
Table SII. Information on patients who donated peripheral blood mononuclear cells.
Code	Age, years	Sex	Volunteer code	Vaccinated against COVID-19	Doses of the vaccine (n)	Date of first dose, dd/mm/yyyy	Vaccine used for the first dose	Date of second dose, dd/mm/yyyy	Vaccine used for the second dose	Date of third dose, dd/mm/yyyy	Vaccine used for the third dose	Date of fourth dose, dd/mm/yyyy	Vaccine used for the fourth dose	Tested positive for COVID-19	Approximate date of positive result	Severity of COVID-19	Previous illness	Daily remedies	COVID test - IgG reagent	COVID test - IgM reagent
C001	21	M	PD0001	Yes	2	2021-08-15	Pfizer	2021-12-08	Pfizer	-	-	-	-	No	-	Not infected	None	None	Yes	No
C002	29	F	PD0002	Yes	4	2021-05-31	Astrazeneca	2021-08-23	Astrazeneca	2022-02-04	Pfizer	2022-07-08	Jansen	No	-	Not infected	None	None	Yes	No
C005	21	F	PD0004	Yes	3	2021-08-07	Pfizer	2021-11-03	Pfizer	2022-03-08	Pfizer	-	-	No	-	Not infected	None	None	-	-
C006	25	F	PD0006	Yes	4	2021-05-28	Astrazeneca	2021-08-20	Astrazeneca	2022-01-07	Pfizer	2022-06-09	Astrazeneca	No	-	Not infected	None	None	Yes	No
C010	21	M	PD0007	Yes	2	2021-08-08	Pfizer	2021-11-29	Pfizer	-	-	-	-	No	-	Not infected	Rhinitis	None	Yes	No
C012	26	F	PD0008	Yes	4	2021-01-21	Coronavac	2021-02-15	Coronavac	2021-12-07	Astrazeneca	2022-06-14	Astrazeneca	No	-	Not infected	None	None	Yes	No
C013	28	F	PD0009	Yes	4	2021-05-20	Astrazeneca	2021-08-12	Astrazeneca	2022-01-17	Pfizer	2022-08-10	Astrazeneca	No	-	Not infected	Hydrocephalus at birth; programmable ventriculoperitoneal shunt (valve); myoma; polycystic ovary syndrome	Contraceptive (Nactali) pill with isolated progestogen or mini pill	Yes	No
C020	23	F	PD0010	Yes	3	2021-06-03	Pfizer	2021-08-27	Pfizer	2022-02-15	Coronavac	-	-	No	-	Not infected	None	Roaccutane	Yes	No
C022	21	F	PD0011	Yes	3	2021-06-17	Astrazeneca	2021-09-14	Pfizer	2022-01-17	Pfizer	-	-	No	-	Not infected	Polycystic ovary	Contraceptive	Yes	No
C029	27	F	PD0013	Yes	4	2021-06-16	Astrazeneca	2021-09-16	Astrazeneca	2021-12-17	Pfizer	2022-03-22	Jansen	No	-	Not infected	Hypothyroidism	Levothyroxine 50 µg	Yes	No
M, male; F, female; COVID-19, coronavirus disease 2019; IgG, immunoglobulin G; IgM, immunoglobulin M.
